1

**August 2015**

2

3

**Probing the rare biosphere of the North-West Mediterranean Sea**

4

Running title: Probing the rare biosphere

5

Bibiana G. Crespo<sup>1\*</sup>, Philip J. Wallhead<sup>2</sup>, Ramiro Logares<sup>1</sup> and Carlos Pedrós-Alió<sup>1</sup>

6

7

<sup>1</sup> Institut de Ciències del Mar, Consejo Superior de Investigaciones Científicas (ICM-CSIC).

8

Passeig Marítim de la Barceloneta, 37-49. 08003. Barcelona, Spain.

9

<sup>2</sup> Norwegian Institute for Water Research (NIVA), Thormøhlens gate 53D, N-5006 Bergen,  
Norway.

10

11

12

\*Present address: Uni Research Environment, Center for Applied Biotechnology,

13

Thormøhlens gate 49B, N-5006 Bergen, Norway.

14

15

Correspondence: Bibiana G. Crespo, Uni Research Environment, Center for Applied

16

Biotechnology, Thormøhlens gate 49B, N-5006 Bergen, Norway.

17

Email: [bibianagc@hotmail.com](mailto:bibianagc@hotmail.com)

18

19

Conflict of interest statement: The authors declare no competing financial interest.

20

Funding: Sampling was supported by the Spanish MICINN grants CTM2005-04795/MAR

21

and CTM2008-03309/MAR. B. G. C. was supported by a Juan de la Cierva contract from the

22

Spanish “Ministerio de Ciencia e Innovación”. Research was funded by the Spanish Plan

23

Nacional de Investigación Científica y Técnica grants Marine Gems (CTM2010-20361) and

24

Blue Genes (CTM2013-48292-C3-1-R).

25

Subject Category: Microbial population and community ecology.

26 Abstract: The relatively recent development of high-throughput sequencing (HTS) techniques  
27 has revealed a wealth of novel sequences found in very low abundance: the rare biosphere.  
28 We performed a deep (1 million sequences per sample) pyrosequencing analysis of two  
29 marine bacterial samples and isolated a culture collection from one of them. Species data  
30 were derived from the sequencing analysis (97% similarity criterion) and various parametric  
31 distributions were fitted to the observed counts. Using the best-fitting Sichel distribution we  
32 estimate a total richness of 1 568–1 669 (95% CI) and 5027–5196 for surface and deep water  
33 samples respectively, implying that 84–89% of the total richness was sequenced. We also  
34 predict that a quadrupling of the present sequencing effort should suffice to observe 90% the  
35 total richness in both samples. Comparing with isolate sequences we found that isolation  
36 retrieved mainly extremely rare taxa which were not obtained by HTS despite the high  
37 sequencing effort. Culturing therefore remains a useful tool for mapping marine bacterial  
38 diversity, in addition to its other uses for studying the ecology of the rare biosphere.

39

#### 40 **Introduction**

41 The question of how many species of living beings there are on Earth has intrigued ecologists  
42 and evolutionary scientists for decades (May, 1988; Erwin, 1991). One of the most recent  
43 estimates suggested around 8.7 million species, but this excluded bacteria and archaea due to  
44 our ignorance of these microorganisms (Mora *et al.*, 2011). The International Census of  
45 Marine Microbes set out to map the diversity of microbes in the oceans with novel high-  
46 throughput sequencing (HTS) techniques (Amaral-Zettler *et al.*, 2010) but a global estimate  
47 was not attempted. Some estimates for marine bacterial species range from  $10^4$  to  $10^6$  based  
48 on different assumptions (Curtis *et al.*, 2002; Hagström *et al.*, 2002). Such a range of values,  
49 spanning several orders of magnitude, shows that we are far from an accurate estimate.

50 Traditionally, bacteria were isolated in pure culture and then characterized biochemically  
51 and genetically until a new species could be formally described. It was realized that the  
52 bacteria able to grow in culture media were a small fraction of the bacterial cells that could be  
53 directly counted on a filter, a discrepancy named the “great plate count anomaly” (Staley &  
54 Konopka, 1985). Different studies estimated that only about 1% of the cells in natural waters  
55 could be cultivated (Pace, 1997; Eilers *et al.*, 2000). Moreover, most of the cells in pure  
56 cultures were not the abundant ones in nature.

57 After the application of molecular cloning to natural systems (Giovannoni *et al.*, 1990;  
58 Pace, 1997) a wealth of new taxa were found and, this time, they were the abundant ones in  
59 the oceans (DeLong, 1997; Pace, 1997). The drawback was that a sequence of the 16S rDNA  
60 did not provide much information about the physiology of the organism. Further, the  
61 realization that bacteria obtained in culture were mostly different from bacterial sequences  
62 obtained in clone libraries produced what could be called the “great clone library anomaly”.  
63 Molecular methods could retrieve many sequences from the abundant organisms but missed  
64 the rare ones, and only occasionally a rare clone was found. Isolation, on the other hand,  
65 retrieved mostly rare bacteria. This anomaly was a consequence of the fact that natural  
66 assemblages are formed by a few taxa in very large concentrations and many taxa in very low  
67 concentrations. The pattern can be easily visualized by looking at a rank-abundance curve  
68 (Pedrós-Alió, 2006). Primers for clone libraries will hybridize with the most abundant  
69 sequences over and over again before they find a rare target. Thus, only a fraction of the  
70 community will be available to cloning and sequencing. The relatively recent development  
71 of HTS techniques and their application to natural microbial communities (Sogin *et al.*, 2006)  
72 now provides an opportunity to solve the “great clone library anomaly”.

73 The study of microbial communities with such technologies has revealed a wealth of novel  
74 sequences found in very low abundance – a rare biosphere (Sogin *et al.*, 2006) – of which  
75 various properties have been examined (Galand *et al.*, 2009; Jones & Lennon, 2010; Pedrós-  
76 Alió, 2012; Caporaso *et al.*, 2012; Lynch *et al.*, 2012; Gibbons *et al.*, 2013). Today, studies  
77 of microbial diversity are performed almost exclusively with such HTS techniques, yet  
78 culturing still seems indispensable (Donachie *et al.*, 2007; Shade *et al.*, 2012; Lekunberri *et*  
79 *al.*, 2014), especially if the aim is to explore the rare biosphere. Shade *et al.* (2012)  
80 compared the outputs of a shallow (~ 2 000 sequences per sample) pyrosequencing analysis  
81 of the bacteria collected from a soil sample and the isolates cultured from the same sample.  
82 They found that 61% of the cultured bacteria were not present in the pyrosequencing dataset,  
83 demonstrating that culturing provided a fruitful route to the rare biosphere that was  
84 complementary to sequencing.

85 In this study, we performed a deep (1 million sequences per sample) pyrosequencing  
86 analysis of two marine bacterial samples and isolated a culture collection from one of them.  
87 Comparing these data sets allowed us assess whether or not current HTS technologies are  
88 sufficient to sequence all the taxa that are observed in culture. By fitting a parametric  
89 statistical model to the sequencing count data (observed abundances) we were also able to  
90 make well-constrained estimates of total species richness and to predict the sequencing effort  
91 necessary to observe 90% of the total richness in both surface and bottom samples.

92

## 93 **Material and methods**

### 94 *1. Study area and sampling*

95 Samples were taken at Station D, an open sea station at 40°52'N and 02°47'E (Table 1, and  
96 Pedrós-Alió *et al.*, 1999) in the NW Mediterranean Sea, during cruise SUMMER between

97 13<sup>th</sup> and 22<sup>nd</sup> of September 2011, on board the RV “García del Cid”. The surface sample was  
98 taken at 5 m on 15<sup>th</sup> September and the bottom sample was collected at 2 000 m depth on 17<sup>th</sup>  
99 September.

100 Sampling was done with Niskin bottles mounted on a rosette with a conductivity-  
101 temperature-depth (CTD) profiler. Water was prefiltered through a 200 µm mesh and  
102 processed on board. To collect microbial biomass, 5–15 L of sea-water were prefiltered  
103 through a 3 µm pore size Durapore filter (Millipore, Cork, Ireland) and free-living bacterial  
104 biomass was collected on a 0.22 µm pore size Sterivex filter (Durapore, Millipore). The  
105 filtration was done in succession using a peristaltic pump. The 0.22 µm pore size Sterivex  
106 unit was filled with 1.8 ml of lysis buffer (40 mM EDTA, 50 mM Tris-HCl, 0.75 M sucrose)  
107 and stored at –80°C. DNA was extracted by a standard protocol using phenol/chloroform  
108 (details in Schauer *et al.*, 2003). The sequencing was done with the same amount of DNA for  
109 every sample.

110

## 111 2. 454-pyrosequencing and noise removal

112 Purified DNA samples were submitted to the Research and Testing Laboratory (Lubbock,  
113 Texas, USA) and prokaryotic diversity was assessed by tag-pyrosequencing of the V1-V3  
114 regions (~400 bp) with the Roche 454 Titanium platform using primers 28F/519R (details in  
115 *SI*). 713 076 and 970 346 tags were retrieved from the surface and the bottom samples,  
116 respectively (Table 1). These data have been deposited in EMBL with accession number  
117 PRJEB9061.

118 Sequence data were processed, including end-trimming, quality control and denoising,  
119 using QIIME (Caporaso *et al.*, 2010). To identify potential chimera sequences, the dataset  
120 was subjected to the ChimeraSlayer implemented in Mothur (Schloss *et al.*, 2011). The final

121 number of tags was thus reduced to 500 262 and 574 960 for surface and bottom samples  
122 respectively (Table 1). The sequences were then clustered into Operational Taxonomic Units  
123 (OTUs) based on the relatedness of the sequences (97% similarity); the taxonomy assignment  
124 of consensus sequences was done using the SILVA v108 database (Quast *et al.*, 2013) (see  
125 details in *SI*).

126

### 127 *3. Isolation of bacterial cultures*

128 Isolates were obtained on board and incubated back in the laboratory where 326 bacterial  
129 colonies were selected, purified and stored (see details in *SI*). 200 µl of these cultures were  
130 placed in 96 well plates, diluted 1:4 and heated (95 °C, 10 min) to cause cell lysis, so  
131 available DNA could be used as a template in Polimerase Chain Reactions (PCR). PCR of the  
132 Internal Transcribed Spacer (ITS) (see *SI*) was done to select as many different species as  
133 possible from the 326 isolates. ITS length is species specific and therefore allows to  
134 differentiate the isolates (Fisher & Triplett 1999; Scheinert *et al.* 1996). According to their  
135 different ITS patterns, 148 isolates were chosen out of 326, including some replicates, and  
136 their 16S rRNA genes were amplified (see *SI*). Nearly the full-length 16S rRNA gene  
137 (approx. 1 300 bp) was sequenced in GENOSCREEN (Lille Cedex, France). Taxonomical  
138 assignment was done by BLAST searches in the National Center for Biotechnology  
139 Information (NCBI) website. The 16S rRNA sequences have been deposited in EMBL with  
140 accession numbers LN845965 to LN846112.

141

142

143 4. Richness, sequencing effort estimates, and diversity of 454 pyrosequencing data

144 Observed species richness ( $S_{\text{obs}}$ ) was computed as the total number of sequenced OTUs (97%  
145 similarity) in each DNA sample. Total species richness ( $S$ ), defined as the total number of  
146 species represented in the water sample, was estimated by fitting a parametric distribution to  
147 the count data following the Bayesian Markov-Chain Monte Carlo (MCMC) method of  
148 Quince *et al.* (2008). We fitted four distributions: the Poisson log-normal, the Poisson log-  
149 Student, the Poisson inverse Gaussian, and the Poisson generalized inverse Gaussian (Sichel  
150 distribution). The best-approximating distribution for each sample was chosen using the  
151 Deviance Information Criterion (DIC; Spiegelhalter *et al.*, 2002), which for our fits was  
152 almost identical to Akaike's Information Criterion (AICc; Burnham & Anderson, 2002; see  
153 Table S1).  $S$  was then estimated as the posterior mean value of the corresponding Bayesian  
154 parameter under the selected model, and 95% credible intervals (CIs, Bayesian equivalent of  
155 confidence intervals) were taken from the 2.5% and 97.5% quantiles of the posterior  
156 distribution. Note that by this method the total richness  $S$  is included in the likelihood  
157 function and estimated jointly with the two or three parameters describing the taxon  
158 abundance distribution, thus facilitating uncertainty calculations (Izsak, 2008; Connolly &  
159 Thibaut, 2012). Also, the Bayesian MCMC approach appears to mitigate the problem of  
160 trapping in local maxima which can severely compromise the calculation of maximum  
161 likelihood estimates (Connolly & Dornelas, 2011).

162 We also predicted the required sequencing effort (RSE) to observe 90% of the total water  
163 sample richness in a hypothetical repeat DNA sample. Higher percentages were not  
164 considered because due to uncertainties in the estimates they could not be meaningfully  
165 constrained. RSE was predicted by simulating an ensemble of 80 repeat sequences using the  
166 selected model and sampling from the posterior parameter distribution, then taking the

167 ensemble mean RSE and (2.5%, 97.5%) percentiles as point predictions and 95% prediction  
168 intervals (PIs) respectively (see *SI* for details). Model selection uncertainty (Burnham &  
169 Anderson, 2002) was not accounted for in the PIs for RSE nor in the CIs for S; however, the  
170 only model with comparable DIC to the best-approximating model (to within 12 units of DIC  
171 or AICc) was merely a special case of the best-fitting model (Poisson inverse Gaussian vs.  
172 Sichel distribution, see Table S1) so the neglected uncertainty was likely small.

173 These simulations and others using the non-selected distributions were also used to test the  
174 performance of various simpler and faster methods to predict S and RSE, including several  
175 nonparametric methods (Chao, 1984; Chao & Lee, 1992; Chao *et al.*, 2000; Shen *et al.*, 2003;  
176 Chao *et al.*, 2009; Wang, 2011; Chao & Shen, 2012; Colwell *et al.*, 2012; Chao *et al.*, 2014;  
177 Chiu *et al.*, 2014) and a semiparametric method whereby multiple saturating functions are  
178 fitted to the collector's curve and the lowest-AICc function is used for prediction (cf. Flather  
179 1996; Guilhaumon *et al.* 2008; Table S2). Unfortunately, none of these faster methods  
180 showed robust performance over all simulations (Table S3; O'Hara, 2005; Quince *et al.*  
181 2008). Herein, we report only the Chao1 estimator for S (Chao, 1984) because it is widely  
182 quoted and thus useful for comparison with other studies.

183 To measure diversity we use the Shannon diversity ( $H' = -\sum p_i \ln p_i$ ) and the Simpson  
184 diversity index ( $D = 1 - \sum p_i^2$  where  $p_i = N_i/N$ , the number of individuals of species  $i$  divided  
185 by the total number of individuals in the sequencing sample  $N$ ). Evenness was computed  
186 with the Pielou index ( $J' = H'/H_{\max}$  where  $H'$  is the Shannon diversity index and  $H_{\max}$  is  
187 the maximal possible Shannon diversity index if all the species were equally abundant:

188  $H_{\max} = -\sum S_{obs}^{-1} \ln S_{obs}^{-1} = \ln S_{obs}$ ). Diversity and evenness were calculated using the “vegan”



189 package (Oksanen *et al.*, 2013) of R (R Core Team, 2013). Rank-abundance plots of the  
190 isolated cultures and the 454 pyrosequencing data were done using “BiodiversityR” (Kindt &  
191 Coe, 2005) and collector’s curves with confidence intervals were computed using “iNEXT”  
192 (Chao *et al.*, 2014; Hsieh *et al.*, 2015).

193

#### 194 *5. Comparison of 454-pyrosequencing tags and isolates*

195 Comparison between isolates and 454 tag-sequences was done by running BLASTn locally.  
196 The isolate sequences were searched for in the 454 tag-sequence datasets and vice versa, and  
197 only the reciprocal matches between these two searches were considered. The output was  
198 filtered using R (R Core Team, 2013), requiring 99% of identical nucleotide matches,  $\geq 75\%$   
199 coverage of the isolate sequence, and a bit-score higher than 100. In all the cases the e-value  
200 was lower than 0.0001.

201 Since the primers used for Sanger sequencing of the isolates and those used for the  
202 pyrosequencing of the environmental DNA were different, the possibility existed of different  
203 biases that could prevent detection of the cultures in the 454 dataset. Multiple alignments of  
204 the sequences of the isolates and the sequences of the primers used in the pyrosequencing  
205 analysis were done using the software Geneious pro 3.5.4 (Kearse *et al.*, 2012), and allowed  
206 us to confirm that the 454 primers hybridized with the sequences of all the isolates.

207

## 208 **Results**

### 209 *1. Pyrosequencing dataset*

210 Observed richness ( $S_{\text{obs}}$ ) was much higher in the bottom (4 460) than in the surface (1 400)  
211 sample (Table 1). In both samples only  $\sim 17\%$  of the OTUs were singletons (an OTU  
212 represented by a single sequence) (Table 1). Evenness ( $J'$ ) and diversity ( $H'$  and  $D$ ) were

213 both higher in the bottom than in the surface sample (Table 1). Collector's curves suggested  
214 that the bottom sample would be richer for a broad range of lesser, equal sampling efforts and  
215 that  $S_{\text{obs}}$  was approaching asymptotic values for both samples (Figure 1).

216 Among the four candidate parametric distributions fitted to the count data, the Sichel  
217 distribution was the best approximating model (lowest DIC and AICc) for both samples  
218 (Table S1). The goodness-of-fit of this distribution is illustrated in Supplementary Figure 1.  
219 The fitted frequencies at moderately low counts may suggest some room for improvement,  
220 but overall for the counts in the range 1–100 shown in Supplementary Figure 1 it appears that  
221 the model gives an adequate fit. Using the Sichel distribution, the total water sample richness  
222 was estimated as 1 568–1 669 (95% CI) and 5 027–5 196 for surface and deep samples  
223 respectively, suggesting that 84–89% and 86–89% of the total richness was observed by  
224 sequencing. By simulating from this distribution we predict that 0.6–4.3 (95% PI) and  
225 1.0–3.2 times the present sequencing effort would suffice to observe 90% of the total richness  
226 in the surface and bottom water samples respectively (Table 1).

227 Rank-abundance curves (Figure 2) showed that the bacterial assemblages from both  
228 samples were characterized by few abundant and many rare OTUs. The most abundant OTU  
229 was more abundant in the surface than in the bottom sample, in agreement with the lower  
230 evenness found for the surface sample (Table 1). The abundance of the most abundant OTU  
231 in the bottom sample was close to the abundance of the second most abundant OTU in the  
232 surface sample.

233

## 234 2. Culture collection

235 Bacterial isolation from the sample collected at the surface retrieved 148 cultures  
236 belonging to 38 different species. The most frequent bacterium in the collection was

237 *Erythrobacter citreus*, isolated 37 times, while 17 species were isolated only once. A rank  
238 abundance plot of the 38 species is shown in Figure 3. The isolates belonged to the phyla  
239 Actinobacteria (4 isolates), Bacteroidetes (4 isolates) and Firmicutes (2 isolates) and to the  
240 Proteobacteria classes Alpha-proteobacteria (18 isolates) and Gamma-proteobacteria (10  
241 isolates). The names of all the isolates are shown in Table 2 and Table 3.

242

### 243 3. Comparison of isolates and sequences

244 Only 14 (37%) of the 38 different isolated species were found in the 454 tag-sequence  
245 datasets: one Actinobacteria, two Bacteroidetes, two Firmicutes, four Alpha-proteobacteria  
246 and five Gamma-proteobacteria isolates (Figure 3, Table 2). Surprisingly, the number of  
247 cultures found in the 454 tag-sequence dataset was higher in the sample collected at 2 000 m  
248 (37%) than in the surface sample (24%), even though the latter was the sample used for  
249 isolation of the bacterial cultures (Figure 3, Table 2). Nine isolated species were found in the  
250 sequences from both samples (maroon in Figure 3), five were found in the bottom sample  
251 only (green in Figure 3) and 24 were not found in either sample (empty symbols in Figure 3).  
252 Practically all of the 454 tag-sequences that matched the sequences from the isolates  
253 belonged to rare OTUs (<1% of the total tags). Only the OTU matching the isolate  
254 *Alteromonas macleodii* str. ‘Balearic Sea AD45’ (Gamma-Proteobacteria) was somewhat  
255 abundant (1.3%) in the bottom sample (Table 2). Further, all the matching sequences made a  
256 larger percentage of the assemblage in the bottom sample than in the surface sample.

257

## 258 Discussion

### 259 1. Estimates of richness

260 In a previous study (Pommier *et al.*, 2010) we used pyrosequencing of the V6 region of the  
261 16S rDNA gene to estimate richness of the bacterial assemblages in the NW Mediterranean  
262 Sea, at the same location and month as the present study but during a different year. Around  
263 20 000 final tags were obtained per sample and we observed 632 and 2 065 OTUs in surface  
264 and deep samples respectively. It is well known that the number of new taxa retrieved  
265 increases with sample size and sampling effort (Preston, 1960; Magurran, 1988; Rosenzweig,  
266 1995) and that a large part of the diversity may remain hidden due to sampling limitations  
267 (Gotelli & Colwell 2011), especially in microbial ecology (Øvreås & Curtis, 2011). In the  
268 present study, we took advantage of pyrosequencing capabilities to increase the sequencing  
269 depth (to around 500 000 final tags per sample) in an attempt to achieve realistic estimates of  
270 the whole bacterial diversity.

271 The resulting collector's curves appear to be approaching asymptotic values (Figure 1) and  
272 the reduced percentage of singletons (~17% vs. 40%–60% in Pommier *et al.*, 2010) suggests  
273 an improved coverage of the bacterial community. However, the order of magnitude of the  
274 Chao1 estimates of total richness are consistent with the earlier study (1 646 and 5 031 here  
275 vs. 1 289 and 4 156 in Pommier *et al.*, 2010), and our present Chao1 estimates agree with the  
276 95% CIs from the best-approximating Sichel distribution (see Table 1). Also, the narrowness  
277 of the confidence intervals for expected richness in Figure 1, relative to the difference in  
278 surface vs. bottom values, suggests that the higher richness of the bottom sample could have  
279 been established with a much lower sequencing effort. The apparent availability of such  
280 basic results at lower effort is clearly good news for further routine and comparative studies.

281 In the surface sample, the most abundant OTU contributed a very large fraction of the total  
282 tags (36%), raising concerns that this may have caused less OTUs to be uncovered and forced  
283 the richness to appear lower. However, if this species is excluded from the analysis, the main

284 effect on the collector's curves is to decrease the total number of tags for the surface sample  
285 by 36%, and the bottom sample is still clearly richer at this lower level of effort (Figure 1).  
286 We also reran the Sichel fit to the surface data with this OTU excluded and obtained a  
287 negligible change (1 species) in the estimated total richness (Table S1). The numbers of  
288 OTUs observed in both samples in this study are consistent with numbers estimated by other  
289 authors for the upper ocean (Rusch *et al.*, 2007; Quince *et al.*, 2008; Pommier *et al.*, 2010;  
290 Crespo *et al.*, 2013) and the deep ocean (Salazar *et al.*, 2015). Pommier *et al.* (2010) and  
291 Crespo *et al.* (2013) also found higher richness in the bottom than in the surface waters.

292 A study of a marine bacterial sample collected in the English Channel (Caporaso *et al.*,  
293 2012) is particularly relevant for our analysis. Station L4 was very deeply sequenced (10  
294 million sequences) by Illumina and revealed ~100 000 OTUs, two orders of magnitude  
295 higher than our estimates of total richness for the Mediterranean samples. To explain this  
296 huge difference we see three possible reasons.

297 First, the English Channel may in reality have more species than the Mediterranean Sea.  
298 However, we consider it unlikely that the real difference is two orders of magnitude given  
299 that both environments correspond to relatively open seawater, albeit in different  
300 hydrographic and nutrient regimes.

301 Second, there could be a statistical issue that caused an underestimation of diversity based  
302 on the smaller number of tags in the present study. For example, when diversity of marine  
303 bacterial communities was estimated from conventional clone libraries (with a few hundred  
304 clones) the Chao1 total richness estimates were on the order of a few hundred OTUs, but  
305 when similar samples were analyzed by HTS (with tens of thousands of sequences per  
306 sample) the Chao1 estimators gave several thousands of OTUs. However, the Chao1  
307 estimator is known to underestimate diversity in strongly heterogeneous and undersampled

308 communities, of which microbial communities are a prime example (Quince *et al.*, 2008;  
309 Øvreås & Curtis, 2011; Chiu *et al.*, 2014). The Sichel distribution used for our estimates was  
310 selected by statistical criteria (Table S1) and gave an apparently good fit to the observed  
311 count frequencies (Supplementary Figure 1). Under this distribution, the total sample  
312 richness was well constrained to within 3–6% at 95% credibility (Table 1). Of course, some  
313 other distribution not considered here may fit the data better and predict a higher richness, but  
314 we have no reason to expect orders of magnitude revisions. Indeed, none of the other three  
315 candidate distributions produced upper CI limits of total richness more than 1 000–2 000  
316 (40–70%) higher than the Sichel upper limits (Table S1).

317 A third possible reason is that the procedure chosen for the L4 OTU identification  
318 overestimated the number of OTUs. Caporaso *et al.* (2012) found that 45–48 % of their OTUs  
319 were singletons, which is a surprisingly large fraction for data sets consisting of over  $10^7$   
320 tags. Increased sequencing depth is generally expected to reduce the fraction of singletons  
321 (Wall *et al.*, 2009; Penton *et al.*, 2013) and this appears to be the case for our Mediterranean  
322 samples (~17% here vs. 40%–60% in Pommier *et al.*, 2010). We believe that the current  
323 processing of pyrosequencing data is quite robust (Quince *et al.*, 2011) but processing of  
324 Illumina tags was still in its infancy when the L4 study was carried out, suggesting that  
325 diversity might have been overestimated due to misidentified OTUs, probably due to bias  
326 from short reads (Claesson *et al.*, 2010). This is actually what happened in the first  
327 application of pyrosequencing to marine bacterial diversity in Sogin *et al.* (2006). Later  
328 studies found ways to properly clean the sequences and estimates became lower (Huse *et al.*,  
329 2010; Quince *et al.*, 2011).

330

331 *2. Comparison of sequencing and isolation*

332 The current power of massive parallel sequencing allows us to probe the rare biosphere  
333 (Caporaso et al., 2012; Pedrós-Alió, 2012; Gibbons *et al.*, 2013), but culturing is an  
334 alternative avenue to explore it (Pedrós-Alió, 2006; Shade *et al.*, 2012). Comparing both  
335 approaches we have found that isolation retrieves some of the rarest taxa since only 24–37%  
336 of the isolates were found in the 454-pyrosequencing data (Figure 2).

337 The observed and estimated total richnesses can be used to estimate the probability that a  
338 species *chosen at random* from the total list of species is retrieved by the present sequencing  
339 effort. This probability is  $S_{\text{obs}}/S \approx 0.87$  for the surface sample, so if the 38 cultured species  
340 could be considered randomly chosen, we would expect to retrieve 33 of them by sequencing.  
341 Given this probability, the fact that we retrieved only 9 (24%) is highly significant ( $P < 10^{-17}$   
342 from binomial test;  $P < 1/3001$  from simulation test, see *SI*). A similar argument applies to  
343 the bottom sample if we assume that all the cultured species (derived from the surface water  
344 sample) are also present in the bottom water sample. The cultured species are apparently less  
345 represented in the sequencing data sets than would be random selections from the lists of all  
346 species in the water samples.

347 Again we see three possible reasons for this discrepancy. First, there may have been a  
348 bias in the PCR and DNA amplification of the sequencing techniques (Berry *et al.*, 2011;  
349 Pinto & Raskin, 2012). However, when tested *in silico*, the primers used for pyrosequencing  
350 covered the whole diversity captured by the primers used for Sanger sequencing of the  
351 isolates, and a bias affecting the diversity found using both methods seems unlikely.

352 Second, since the cultures were isolated from the whole water sample while the  
353 pyrosequencing data were obtained from the 0.2–3  $\mu\text{m}$  fraction, some species attached to  
354 larger particles may have been excluded from the sequencing datasets. However, 18 of the  
355 38 cultured species are expected to be free-living bacteria since they belong to the Alpha-

356 proteobacteria class (DeLong *et al.*, 1993; Crespo *et al.*, 2013) and should therefore be  
357 present in the 0.2–3  $\mu\text{m}$  fraction used for sequencing. If the comparison is restricted to this  
358 class we find that only 4 out of 18 isolates are retrieved in both surface and bottom  
359 sequences, which is still a highly significant deficit ( $P < 10^{-9}$ , binomial test;  $P < 1/3001$ ,  
360 simulation test).

361 A third possible reason is that the special environment imposed by culturing may favour  
362 certain species that are generally less successful in natural oceanic conditions, and  
363 consequently too rare to retrieve with the present sequencing effort. The process of culturing  
364 might in this sense “select for the losers” in the natural environment. However, if this were a  
365 consistent effect, we would expect the few isolates that are retrieved by sequencing to have  
366 anomalously low tag counts, but this not in fact observed (Table 2). The surface counts,  
367 while low/rare in an absolute sense ( $<0.1\%$  of total tags), are not low relative to a random  
368 sample from the observed or modelled count distributions ( $P > 0.05$  from bootstrap and  
369 simulation tests on mean, median and maximum counts, see *SI*), and the bottom counts are if  
370 anything slightly higher than a random sample ( $P < 0.05$  for mean, median and maximum  
371 counts). The culturing process might therefore have selected for a few moderately-rare  
372 species that grow better in deep water (Table 2), probably because the culturing was done in  
373 the dark, plus a larger number of extremely rare species that could not be retrieved with the  
374 present sequencing effort (Table 3).

375 Our results suggest that, with present HTS capacity, culturing remains an important  
376 complementary tool for mapping microbial diversity. Future improvements in sequencing  
377 depth will eventually uncover the isolated bacteria, though perhaps only slowly. However,  
378 even if the whole bacterial diversity were mapped by sequencing, culturing would remain  
379 essential for the study of marine bacterial communities, especially if the target is the rare



380 biosphere (Donachie *et al.*, 2007). Culturing provides complete genomes and allows the  
381 study of the physiology, metabolism and ecology of marine bacteria, yielding information  
382 that cannot be obtained by sequencing alone (Giovannoni & Stingl, 2007).

383 In conclusion, using deep sequencing ( $10^6$  tags) we have been able to obtain robust  
384 estimates of the total richness of the bacterial assemblages in two samples from the surface  
385 and deep Mediterranean Sea. These estimates were on the order of 2 000 to 5 000 taxa, and  
386 current sequencing capacity appears to be in reach of observing 90% of the total diversity.  
387 Comparison with cultured isolates showed that many of the isolated species were from deep  
388 within the rare biosphere and not retrieved by sequencing, thus confirming that sequencing  
389 and culturing remain complementary strategies for probing the rare marine biosphere.

390

### 391 **Acknowledgements**

392 We thank the crews and scientists in cruises Modivus and SUMMER, both on the RV García  
393 del Cid, supported by the Spanish MICINN grants CTM2005-04795/MAR and CTM2008-  
394 03309/MAR respectively.

395 We thank F. M. Cornejo-Castillo for his advice on the method for differentiation of  
396 isolates. Help from E. Sa and V. Balagué with bacterial culturing and PCR work is greatly  
397 appreciated.

398 B. G. C. was supported by a Juan de la Cierva contract from the Spanish “Ministerio de  
399 Ciencia e Innovación”. Research was funded by the Spanish “Plan Nacional de Investigación  
400 Científica y Técnica” grants Marine Gems (CTM2010-20361) and Blue Genes (CTM2013-  
401 48292-C3-1-R).

402

403

404 Conflict of interest statement: The authors declare no competing financial interest.  
405

406 Supplementary information (*SI*) is available at ISME Journal's website.

407

408 **References**

- 409 Alonso-Sáez L, Balagué V, Sà EL, Sánchez O, González JM, Pinhassi J, *et al.* (2007).  
410 Seasonality in bacterial diversity in north-west Mediterranean coastal waters: assessment  
411 through clone libraries, fingerprinting and FISH. *FEMS Microbiol Ecol* **60**:98–112.
- 412 Alonso-Sáez L, Sánchez O, Gasol JM, Balagué V, Pedrós-Alio C. (2008). Winter-to-summer  
413 changes in the composition and single-cell activity of near-surface Arctic prokaryotes.  
414 *Environ Microbiol* **10**:2444–2454.
- 415 Amaral-Zettler L, Artigas LF, Baross J, Bharathi LPA, Boetius A, Chandramohan D, *et al.*  
416 (2010). A Global Census of Marine Microbes — Census of Marine Life Maps and  
417 Visualization. In: McIntyre., A (ed). *Life in the World's Oceans: Diversity, Distribution,*  
418 *and Abundance.* Wiley-Blackwell, pp 223–345.
- 419 Berry D, Ben Mahfoudh K, Wagner M, Loy A. (2011). Barcoded primers used in multiplex  
420 amplicon pyrosequencing bias amplification. *Appl Environ Microbiol* **77**:7846–7849.
- 421 Burnham KP, Anderson DR. (2002). Model selection and multimodel inference: A practical  
422 information-theoretic approach. 2nd edition. Springer-Verlag: New York.
- 423 Caporaso JG, Kuczynski J, Stombaugh J, Bittinger K, Bushman F, Costello E, *et al.* (2010).  
424 QIIME allows analysis of high- throughput community sequencing data. *Nature* **7**:335–  
425 336.
- 426 Caporaso JG, Paszkiewicz K, Field D, Knight R, Gilbert JA. (2012). The Western English  
427 Channel contains a persistent microbial seed bank. *ISME J* **6**:1089–1093.
- 428 Chao A. (1984). Nonparametric estimation of the number of classes in a population. *Scand J*  
429 *Stat* **11**:265–270.
- 430 Chao A, Colwell RK, Lin C, Gotelli NJ. (2009). Sufficient Sampling for Asymptotic  
431 Minimum Species Richness Estimators. *Ecology* **90**:1125–1133.
- 432 Chao A, Gotelli N, Hsieh T, Sander E, Ma K, Colwell R, *et al.* (2014). Rarefaction and  
433 extrapolation with Hill numbers: a framework for sampling and estimation in species  
434 diversity studies. *Ecol Monogr* **84**:45–67.
- 435 Chao A, Hwang W, Chen Y, Kuo C. (2000). Estimating the number of shared species.  
436 *Statistica sinica* **10**:227–246.
- 437 Chao A, Lee S-M. (1992). Estimating the number of classes via sample coverage. *J Am Stat*  
438 *Assoc* **87**:210–217.
- 439 Chao A, Shen T. (2012). Program SPADE (Species Prediction And Diversity Estimation).  
440 Program and use's guide published at <http://chao.stat.nthu.edu.tw>.
- 441
- 442 Chiu C-H, Wang Y-T, Walther BA, Chao A. (2014). An improved nonparametric lower  
443 bound of species richness via a modified good-turing frequency formula. *Biometrics*  
444 **70**:671–682.

445

446 Claesson MJ, Wang Q, O'Sullivan O, Greene-Diniz R, Cole JR, Ross RP, *et al.* (2010).

447 Comparison of two next-generation sequencing technologies for resolving highly complex  
448 microbiota composition using tandem variable 16S rRNA gene regions. *Nucleic Acids Res*  
449 **38**:e200.

450 Colwell RK, Chao A, Gotelli NJ, Lin S-Y, Mao CX, Chazdon RL, *et al.* (2012). Models and  
451 estimators linking individual-based and sample-based rarefaction, extrapolation and  
452 comparison of assemblages. *J Plant Ecol* **5**:3–21.

453 Connolly SR, Dornelas M. (2011). Fitting and empirical evaluation of models for species  
454 abundance distributions. In: Magurran, A & McGill, B (eds). *Biological diversity:*  
455 *Frontiers in measurement and assessment.* Oxford University Press: Oxford, UK, pp 123-  
456 141.

457 Connolly SR, Thibaut LM. (2012). A comparative analysis of alternative approaches to  
458 fitting species-abundance models. *J Plant Ecol* **5**: 32-45.

459 Crespo BG, Pommier T, Fernández-Gómez B, Pedrós-Alió C. (2013). Taxonomic  
460 composition of the particle-attached and free-living bacterial assemblages in the  
461 Northwest Mediterranean Sea analyzed by pyrosequencing of the 16S rRNA.  
462 *Microbiology open* **2**:541–552.

463 Curtis TP, Sloan WT, Scannell JW. (2002). Estimating prokaryotic diversity and its limits.  
464 *Proc Natl Acad Sci* **99**:10494–10499.

465 DeLong E. (1997). Marine microbial diversity: the tip of the iceberg. *Trends Biotechnol*  
466 **15**:203–207.

467 DeLong E, Franks D, Alldredge A. (1993). Phylogenetic diversity of aggregate-attached vs.  
468 free-living marine bacterial assemblages. *Limnol Oceanogr* **38**:924–934.

469 Donachie SP, Foster JS, Brown MV. (2007). Culture clash: challenging the dogma of  
470 microbial diversity. *ISME J* **1**:97–99.

471 Eilers H, Pernthaler J, Glöckner FO, Amann R. (2000). Culturability and *In situ* abundance of  
472 pelagic bacteria from the North Sea. *Appl Environ Microbiol* **66**:3044–3051.

473 Erwin T. (1991). How many species are there? Revisited. *Conserv Biol* **5**:1–4.

474 Fisher MM, Triplett EW. (1999). Automated approach for ribosomal intergenic spacer  
475 analysis of microbial diversity and its application to freshwater bacterial communities.  
476 *Appl Environ Microbiol* **65**:4630–4636.

477 Flather CH. (1996). Fitting species-accumulation functions and assessing regional land use  
478 impacts on avian diversity. *J Biogeogr* **23**:155–168.

479 Galand PE, Casamayor EO, Kirchman DL, Lovejoy C. (2009). Ecology of the rare microbial  
480 biosphere of the Arctic Ocean. *Proc Natl Acad Sci* **106**:22427–22432.

- 481 Gibbons SM, Caporaso JG, Pirrung M, Field D, Knight R, Gilbert JA. (2013). Evidence for a  
482 persistent microbial seed bank throughout the global ocean. *Proc Natl Acad Sci* **110**:4651–  
483 4655.
- 484 Gilbert JA, Steele JA, Caporaso JG, Steinbrück L, Reeder J, Temperton B, *et al.* (2012).  
485 Defining seasonal marine microbial community dynamics. *ISME J* **6**:298–308.
- 486 Giovannoni S, Stingl U. (2007). The importance of culturing bacterioplankton in the “ omics  
487 ” age. *Nat Rev Microbiol* **2007**:820–826.
- 488 Giovannoni SJ, Britschgi TB, Moyer CL, Field KG. (1990). Genetic diversity in Sargasso  
489 Sea bacterioplankton. *Nature* **345**:60–63.
- 490 Gotelli NJ, Colwell RK. (2011). Estimating species richness. In: Magurran, A & McGill, B  
491 (eds). *Biological diversity: Frontiers in measurement and assessment*. Oxford University  
492 Press: Oxford, UK, pp 39-54.
- 493 Guilhaumon F, Gimenez O, Gaston KJ, Mouillot D. (2008). Taxonomic and regional  
494 uncertainty in species-area relationships and the identification of richness hotspots. *Proc*  
495 *Natl Acad Sci U S A* **105**:15458–15463.
- 496 Hagström Å, Pommier T, Rohwer F, Simu K, Svensson D, Zweifel U. (2002). Bio-  
497 informatics reveal surprisingly low species richness in marine bacterioplankton. *Appl*  
498 *Environ Microbiol* **67**:3628–3633.
- 499 Hsieh T, Ma K, Chao A. (2015). iNEXT: An R Package for interpolation and extrapolation of  
500 species diversity (Hill numbers). Submitted manuscript.  
501 <http://chao.stat.nthu.edu.tw/blog/software-download/>.
- 502 Huse SM, Welch DM, Morrison HG, Sogin ML. (2010). Ironing out the wrinkles in the rare  
503 biosphere through improved OTU clustering. *Environ Microbiol* **12**:1889–1898.
- 504 Izsak R. (2008). Maximum likelihood fitting of the Poison lognormal distribution. *Environ*  
505 *Ecol Stat* **15**:143-156.
- 506 Jones SE, Lennon JT. (2010). Dormancy contributes to the maintenance of microbial  
507 diversity. *Proc Natl Acad Sci U S A* **107**:5881–5886.
- 508 Kearse M, Moir R, Wilson A, Stones-Havas S, Cheung M, Sturrock S, *et al.* (2012).  
509 Geneious Basic: an integrated and extendable desktop software platform for the  
510 organization and analysis of sequence data. *Bioinformatics* **28**:1647–1649.
- 511 Kindt R, Coe R. (2005). *Tree diversity analysis. A manual and software for common*  
512 *statistical methods for ecological and biodiversity studies*. World Agroforestry Centre  
513 (ICRAF): Nairobi (Kenya).
- 514 Lekunberri I, Gasol JM, Acinas SG, Gómez-Consarnau L, Crespo BG, Casamayor EO, *et al.*  
515 (2014). The phylogenetic and ecological context of cultured and whole genome-sequenced  
516 planktonic bacteria from the coastal NW Mediterranean Sea. *Syst Appl Microbiol* **37**:216-  
517 228.

- 518 Lynch MDJ, Bartram AK, Neufeld JD. (2012). Targeted recovery of novel phylogenetic  
519 diversity from next-generation sequence data. *ISME J* **6**:2067–2077.
- 520 Magurran AE. (1988). Ecological diversity and its measurements. Princeton University Press:  
521 Princeton, New Jersey.
- 522 May RM. (1988). How many species are there on Earth? *Science* **241**:1441–1449.
- 523 Mora C, Tittensor DP, Adl S, Simpson AGB, Worm B. (2011). How many species are there  
524 on Earth and in the ocean? *PLoS Biol* **9**:e1001127.
- 525 O’Hara RB. (2005). Species richness estimators: how many species can dance on the head of  
526 a pin? *J Anim Ecol* **74**:375–386.
- 527 Oksanen J, Guillaume-Blanchet F, Kindt R, Legendre P, Minchin P, O’Hara R, *et al.* (2013).  
528 Vegan: Community Ecology Package.
- 529 Øvreås L, Curtis TP. (2011). Microbial diversity and ecology. In: Magurran, A & McGill, B  
530 (eds). Biological diversity: Frontiers in measurement and assessment. Oxford University  
531 Press: Oxford, UK, pp. 221–236.
- 532 Pace NR. (1997). A molecular view of microbial diversity and the biosphere. *Science*  
533 **276**:734–740.
- 534 Pedrós-Alió C. (2006). Marine microbial diversity: can it be determined? *Trends Microbiol*  
535 **14**:257–263.
- 536 Pedrós-Alió C. (2012). The Rare Bacterial Biosphere. *Ann Rev Mar Sci* **4**:449–466.
- 537 Pedrós-Alió C, Calderón-Paz J-I, Guixa-Boixereu N, Estrada M, Gasol JM. (1999).  
538 Bacterioplankton and phytoplankton biomass and production during summer stratification  
539 in the northwestern Mediterranean Sea. *Deep Sea Res Part I Oceanogr Res Pap* **46**:985–  
540 1019.
- 541 Penton CR, St Louis D, Cole JR, Luo Y, Wu L, Schuur EAG, *et al.* (2013). Fungal diversity  
542 in permafrost and tallgrass prairie soils under experimental warming conditions. *Appl*  
543 *Environ Microbiol* **79**:7063–7072.
- 544 Pinto AJ, Raskin L. (2012). PCR biases distort bacterial and archaeal community structure in  
545 pyrosequencing datasets. *PLoS One* **7**:e43093.
- 546 Pommier T, Neal P, Gasol J, Coll M, Acinas S, Pedrós-Alió C. (2010). Spatial patterns of  
547 bacterial richness and evenness in the NW Mediterranean Sea explored by pyrosequencing  
548 of the 16S rRNA. *Aquat Microb Ecol* **61**:221–233.
- 549 Preston FW. (1960). Time and Space and the Variation of Species. *Ecology* **41**:612–627.
- 550 Quast C, Pruesse E, Yilmaz P, Gerken J, Schweer T, Yarza P, *et al.* (2013). The SILVA  
551 ribosomal RNA gene database project: improved data processing and web-based tools.  
552 *Nucleic Acids Res* **41**:590–596.

- 553 Quince C, Curtis TP, Sloan WT. (2008). The rational exploration of microbial diversity.  
554 *ISME J* **2**:997–1006.
- 555 Quince C, Lanzen A, Davenport RJ, Turnbaugh PJ. (2011). Removing noise from  
556 pyrosequenced amplicons. *BMC Bioinformatics* **12**:38.
- 557 R Core Team. (2013). R: A language and environment for statistical computing.
- 558 Rosenzweig M. (1995). Species diversity in space and time. Cambridge University Press:  
559 Cambridge.
- 560 Rusch DB, Halpern AL, Sutton G, Heidelberg KB, Williamson S, Yooseph S, *et al.* (2007).  
561 The Sorcerer II Global Ocean Sampling expedition: northwest Atlantic through eastern  
562 tropical Pacific. *PLoS Biol* **5**:e77.
- 563 Salazar G, Cornejo-Castillo, FM Benítez-Barrios V, Fraile-Nuez E, Álvarez-Salgado, XA  
564 Duarte C, Gasol J, Acinas S. (2015). Global diversity and biogeography of deep-sea  
565 pelagic prokaryotes. *ISME J*. (In press)
- 566 Schauer M, Balagué V, Pedrós-Alió C, Massana R. (2003). Seasonal changes in the  
567 taxonomic composition of bacterioplankton in a coastal oligotrophic system. *Aquat*  
568 *Microb Ecol* **31**:163–174.
- 569 Scheinert P, Krausse R, Ullmann U, Söller R, Krupp G. (1996). Molecular differentiation of  
570 bacteria by PCR amplification of the 16S–23S rRNA spacer. *J Microbiol Methods*  
571 **26**:103–117.
- 572 Schloss PD, Gevers D, Westcott SL. (2011). Reducing the effects of PCR amplification and  
573 sequencing artifacts on 16S rRNA-based studies. *PLoS One* **6**:e27310.
- 574 Shade A, Hogan CS, Klimowicz AK, Linske M, McManus PS, Handelsman J. (2012).  
575 Culturing captures members of the soil rare biosphere. *Environ Microbiol* **14**:2247–2252.
- 576 Shen T-J, Chao A, Lin C-F. (2003). Predicting the number of new species in further  
577 taxonomic sampling. *Ecology* **84**:798–804.
- 578 Sogin ML, Morrison HG, Huber JA, Mark Welch D, Huse SM, Neal PR, *et al.* (2006).  
579 Microbial diversity in the deep sea and the underexplored “rare biosphere”. *Proc Natl*  
580 *Acad Sci U S A* **103**:12115–12120.
- 581 Spiegelhalter D, Best N, Carlin B, van der Linde A. (2002). Bayesian measures of model  
582 complexity and fit (with discussion). *J R Stat Soc Ser B* **64**:583-639.
- 583 Staley J, Konopka A. (1985). Measurement of in situ activities of nonphotosynthetic  
584 microrganisms in aquatic and terrestrial habitats. *Annu Rev Microbiol* **39**:321–383.
- 585 Wall PK, Leebens-Mack J, Chanderbali AS, Barakat A, Wolcott E, Liang H, *et al.* (2009).  
586 Comparison of next generation sequencing technologies for transcriptome  
587 characterization. *BMC Genomics* **10**:347.
- 588 Wang J. (2011). SPECIES : An R Package for Species Richness.

589 **Figure legends**

590 Figure 1. OTU collector's curves of the surface (orange line) and bottom (green line)

591 samples. Black dashed lines indicate the 95% confidence intervals (95% CI).

592

593 Figure 2. Rank-abundance plots of surface (A) and bottom (B) samples. The red line is the

594 rank-abundance plot calculated with the actual data. The dark blue line shows the estimates

595 of the sequencing effort necessary to retrieve 90% of the total richness calculated by

596 simulation from the best-approximating Sichel distribution (posterior mean estimate). The

597 vertical black line separates the real data (left) from the estimates (right). The percentage of

598 cultured isolates found in the 454-pyrosequencing datasets is indicated at the left side of the

599 black vertical line. The percentage of cultured isolates not found in the 454-pyrosequencing

600 datasets, and that would presumably be found by increasing the sequencing effort, is

601 indicated at the right of the black vertical line. Insert pictures show some of the bacterial

602 cultures grown from the surface sample. Font size and pictures are scaled according to the

603 percentage of cultured isolates found or not found in the 454-pyrosequencing datasets.

604

605 Figure 3. Rank-abundance plot of the 38 isolated bacterial species. The maroon squares

606 indicate the cultured isolates found in both the surface and bottom 454-pyrosequencing

607 datasets, the green triangles indicate the cultures isolated found only in the bottom 454-

608 pyrosequencing dataset, and the white circles indicate the cultures that were not found in any

609 of the 454-pyrosequencing datasets. A list of the isolated bacterial species can be found in

610 Table 2 and Table 3.

611

612



613 **Table captions**

614 Table 1. Summary of location and depth (m) of samples, total sequences before (Raw Tags)  
615 and after (Final Tags) cleaning, richness (S) computed as total Operational Taxonomic Units  
616 (OTUs) clustered at 97% identity, percentage of singletons. Diversity was estimated using the  
617 Shannon diversity index ( $H'$ ), Simpson diversity (D) and Pielou's evenness (J). Total  
618 richness (S) was estimating using the Chao1 lower bound estimator (Chao, 1984) and the  
619 Sichel distribution, fitted to the count frequency data by the Bayesian method of Quince *et al.*  
620 (2008) and selected from four alternative candidate models using the Deviance Information  
621 Criterion. Using the Sichel distribution, point estimates and 95% credible intervals (CIs) for  
622 S were obtained from the mean and (2.5%, 97.5%) quantiles of the posterior distribution  
623 sampled 15000 times by Markov Chain Monte Carlo (after a burn-in period of 100 000  
624 samples, see Quince *et al.*, 2008). The Required Sequencing Effort (RSE) to sequence 90%  
625 of the total richness was predicting by hierarchical simulation (see *SI*) and is quoted in terms  
626 of the number of final tags and as a multiple of the present sequencing effort. Point estimates  
627 and 95% prediction intervals (PIs) for RSE were obtained from the mean and (2.5%, 97.5%)  
628 quantiles from an ensemble of 80 simulations using the Sichel distribution.

629 Table 2. Isolates' closest relative according to BLAST results, % of identity with the BLAST  
630 reference strain (identity BLAST), GenBank accession number of the BLAST reference  
631 strain, number of tags matching the isolates sequences in the surface and bottom samples  
632 (Tags in Surface, Tags in Bottom), percentage of the tags in the surface and bottom samples  
633 (% Surface, % Bottom) and number of isolates of each taxa sequenced. Actino  
634 (Actinobacteria), Bact (Bacteroidetes), Firm (Firmicutes), Alpha-P (Alpha-Proteobacteria)  
635 and Gamma-P (Gamma-Proteobacteria).

636 Table 3. Isolates not matching the tag sequences. Isolates' closest relative according to  
637 BLAST results, % of identity with the BLAST reference strain (identity BLAST), GenBank  
638 accession number of the BLAST reference strain and number of isolates of each taxa  
639 sequenced. Actino (Actinobacteria), Bact (Bacteroidetes), Firm (Firmicutes), Alpha-P  
640 (Alpha-Proteobacteria) and Gamma-P (Gamma-Proteobacteria).

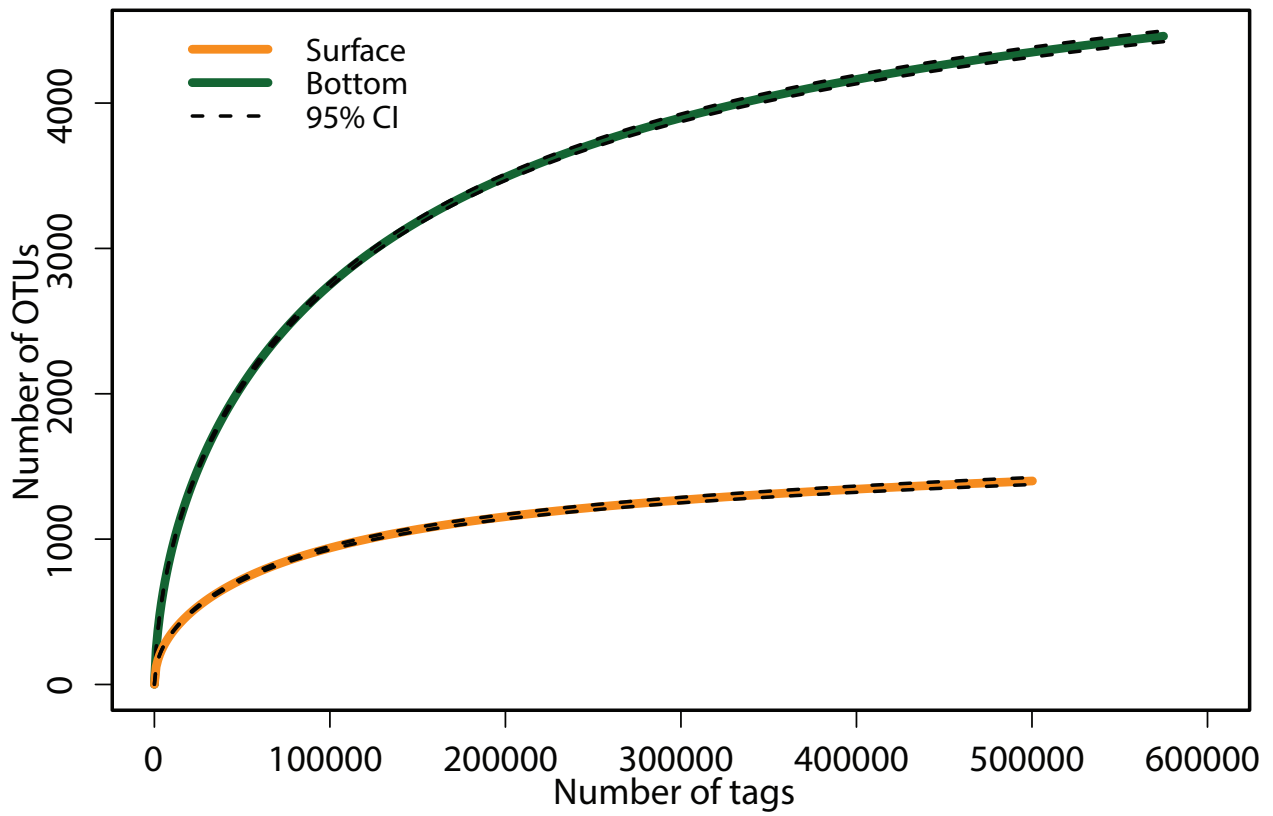

Figure 1  
Crespo et al.

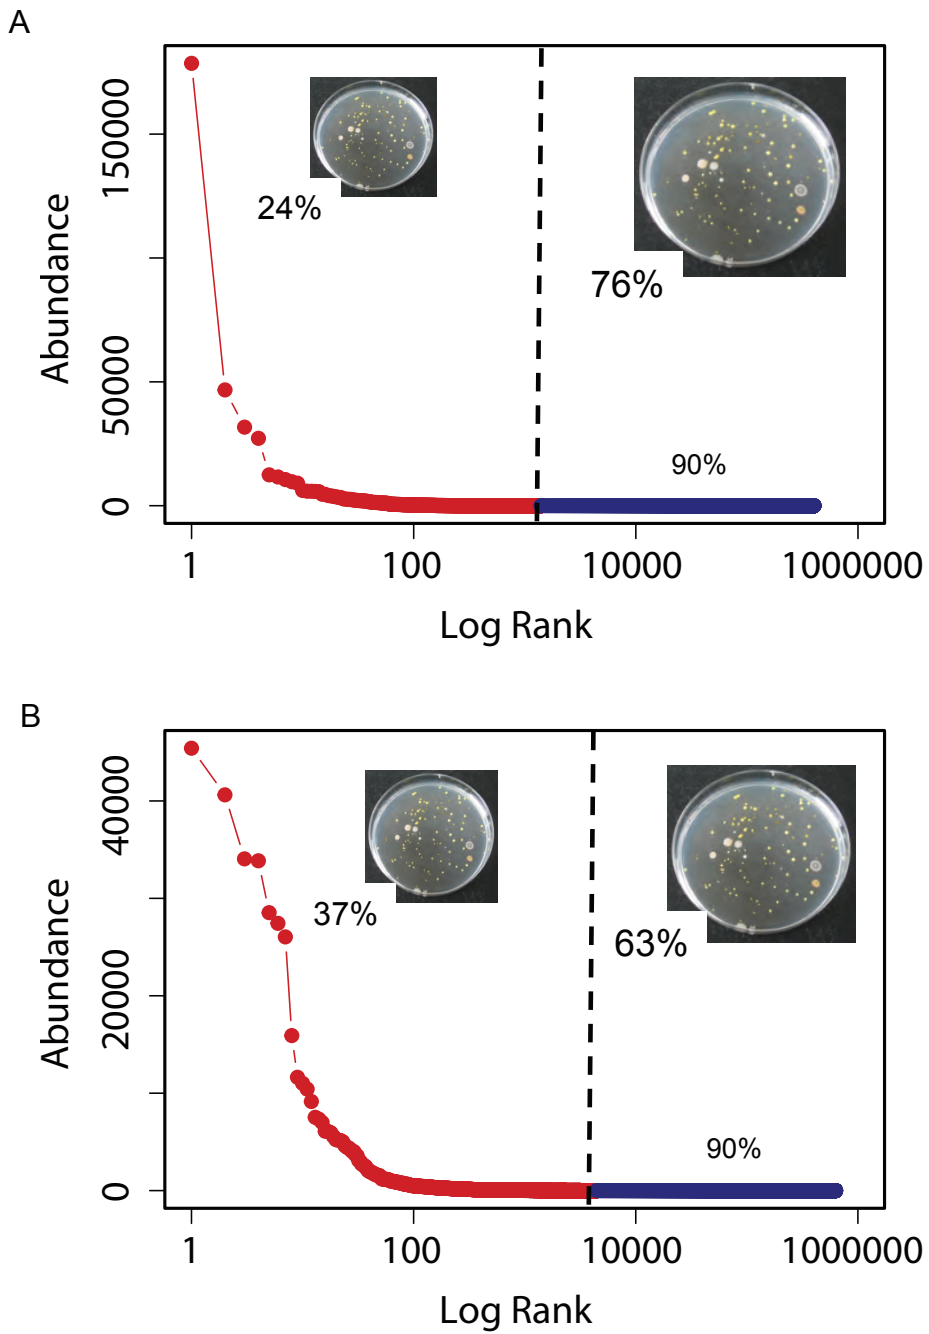

Figure 2  
Crespo et al.

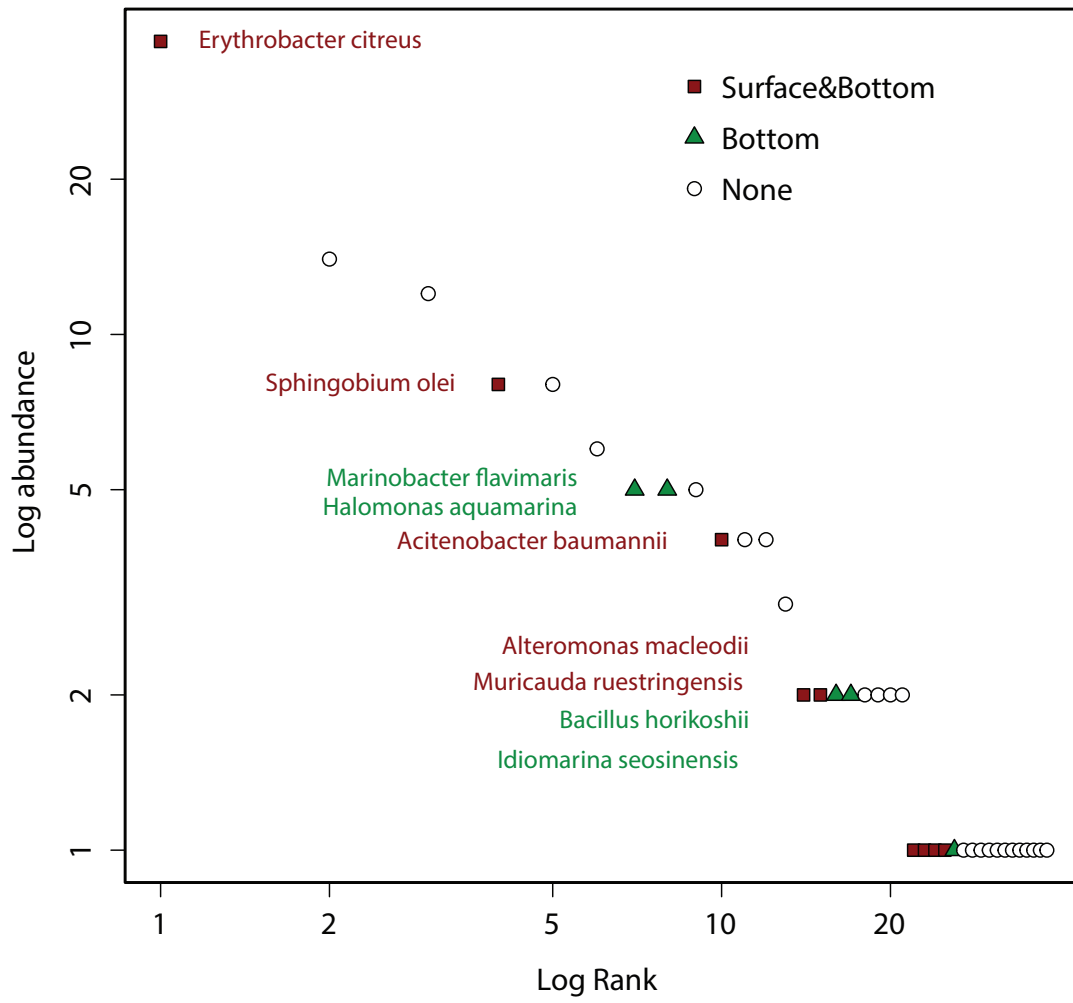

Table 1.

|                                                           | Surface                 | Bottom                  |
|-----------------------------------------------------------|-------------------------|-------------------------|
| Lat, Long                                                 | 40°52'N, 02°47'E        | 40°52'N, 02°47'E        |
| Depth (m)                                                 | 5                       | 2 000                   |
| Raw Tags                                                  | 713 076                 | 970 346                 |
| Final Tags                                                | 500 262                 | 574 960                 |
| OTUs 97 % identity ( $S_{obs}$ )                          | 1 400                   | 4 460                   |
| Singletons (% OTUs)                                       | 17.86                   | 17.2                    |
| Diversity estimates:                                      |                         |                         |
| H' (Shannon diversity index)                              | 3.26                    | 4.75                    |
| D (Simpson diversity)                                     | 0.45                    | 0.66                    |
| J' (Pielou's evenness)                                    | 0.45                    | 0.57                    |
| Total richness (S):                                       |                         |                         |
| Chao1 point estimate                                      | 1 646                   | 5 031                   |
| Sichel point estimate                                     | 1 615                   | 5 109                   |
| Sichel 95% CI                                             | 1 568–1 669             | 5 027–5 196             |
| Required Sampling Effort (RSE) for 90% of total richness: |                         |                         |
| Sichel point prediction (final tags)                      | $0.9 \times 10^6$       | $1.2 \times 10^6$       |
| Sichel 95% PI (final tags)                                | $(0.3-2.2) \times 10^6$ | $(0.6-1.9) \times 10^6$ |
| Sichel point prediction / present                         | 1.8                     | 2                       |
| Sichel 95% PI / present effort                            | 0.6–4.3                 | 1.0–3.2                 |

Table 2.

| Isolates' closest relative                                      | Identity BLAST | GenBank accession number |
|-----------------------------------------------------------------|----------------|--------------------------|
| <i>Uncultured Brevundimonas</i> sp. (Alpha-P)                   | 99.90%         | JX047099                 |
| <i>Alteromonas macleodii</i> str. 'Balearic Sea AD45' (Gamma-P) | 100%           | CP003873                 |
| <i>Sphingobium olei</i> (Alpha- P)                              | 100%           | HQ398416                 |
| <i>Erythrobacter citreus</i> (Alpha- P)                         | 100%           | EU440970                 |
| <i>Citromicrobium</i> sp. (Alpha- P)                            | 100%           | HQ871848                 |
| <i>Acinetobacter baumannii</i> (Gamma- P)                       | 100%           | JX966437                 |
| <i>Bizionia</i> sp. (Bact)                                      | 100%           | EU143366                 |
| <i>Muricauda ruestringensis</i> (Bact)                          | 99%            | JN791391                 |
| <i>Microbacterium jejuense</i> (Actino)                         | 100%           | AM778450                 |
| <i>Marinobacter flavimaris</i> (Gamma-P)                        | 100%           | AB617558                 |
| <i>Bacillus</i> sp. (Firm)                                      | 100%           | AM950311                 |
| <i>Bacillus horikoshii</i> (Firm)                               | 100%           | JQ904719                 |
| <i>Halomonas aquamarina</i> (Gamma- P)                          | 100%           | AB681582                 |
| <i>Idiomarina seosinensis</i> (Gamma- P)                        | 99.90%         | EU440964                 |

| Tags in Surface | % Surface             | Tags in Bottom | % Bottom              | Number of isolates |
|-----------------|-----------------------|----------------|-----------------------|--------------------|
| 76              | $1.52 \times 10^{-2}$ | 172            | $2.99 \times 10^{-2}$ | 1                  |
|                 | $8.00 \times 10^{-3}$ |                | 1.31                  |                    |
| 40              |                       | 7526           |                       | 2                  |
| 34              | $6.80 \times 10^{-3}$ | 232            | $4.04 \times 10^{-2}$ | 8                  |
| 31              | $6.20 \times 10^{-3}$ | 861            | $1.50 \times 10^{-1}$ | 37                 |
| 22              | $4.40 \times 10^{-3}$ | 39             | $6.78 \times 10^{-3}$ | 1                  |
| 16              | $3.20 \times 10^{-3}$ | 128            | $2.23 \times 10^{-2}$ | 4                  |
| 13              | $2.60 \times 10^{-3}$ | 66             | $1.15 \times 10^{-2}$ | 1                  |
| 4               | $8.00 \times 10^{-4}$ | 92             | $1.60 \times 10^{-2}$ | 2                  |
| 1               | $2.00 \times 10^{-4}$ | 15             | $2.61 \times 10^{-3}$ | 1                  |
| 0               | 0                     | 174            | $3.03 \times 10^{-2}$ | 5                  |
| 0               | 0                     | 17             | $2.96 \times 10^{-3}$ | 1                  |
| 0               | 0                     | 8              | $1.39 \times 10^{-3}$ | 2                  |
| 0               | 0                     | 1              | $1.74 \times 10^{-4}$ | 5                  |
| 0               | 0                     | 1              | $1.74 \times 10^{-4}$ | 2                  |



Table 3.

| Isolates' closest relative                          | Identity BLAST | GenBank accession number | Number of isolates |
|-----------------------------------------------------|----------------|--------------------------|--------------------|
| <i>Microbacterium aquimaris</i> (Actino)            | 99.60%         | HQ009858                 | 14                 |
| <i>Thalassospira</i> sp. (Alpha-P)                  | 100%           | EU440837                 | 12                 |
| <i>Fulvimarina pelagi</i> (Alpha-P)                 | 96%            | HQ622550                 | 8                  |
| <i>Alcanivorax</i> sp. (Gamma-P)                    | 99.70%         | AB681671                 | 6                  |
| <i>Devosia subaequoris</i> (Alpha-P)                | 100%           | JQ844475                 | 5                  |
| <i>Alterierythrobacter</i> sp. (Alpha-P)            | 100%           | FM177586                 | 4                  |
| <i>Alteromonas macleodii</i> (Gamma-P)              | 99.90%         | CP003917                 | 4                  |
| <i>Erythrobacter</i> sp. (Alpha-P)                  | 100%           | AB429073                 | 3                  |
| <i>Brevundimonas</i> sp. (Alpha-P)                  | 99.90%         | HQ830182                 | 2                  |
| <i>Roseivirga spongicola</i> (Bact)                 | 99.80%         | NR043531                 | 2                  |
| <i>Devosia hwasunensis</i> (Alpha-P)                | 99%            | HQ697727                 | 2                  |
| Rhizobiales family (Alpha-P)                        | 96%            | HQ622550                 | 2                  |
| <i>Arthrobacter oxydans</i> (Actino)                | 100%           | EU086823                 | 1                  |
| <i>Emticicia</i> sp. (Bact)                         | 100%           | JX426065                 | 1                  |
| <i>Halomonas</i> sp. (Gamma-P)                      | 100%           | HE586874                 | 1                  |
| <i>Marinobacter hydrocarbonoclasticus</i> (Gamma-P) | 100%           | JQ799097                 | 1                  |
| <i>Nitratireductor</i> sp. (Alpha-P)                | 99.90%         | AM981316                 | 1                  |
| <i>Nocardioides marinus</i> (Actino)                | 99.90%         | NR043787                 | 1                  |
| <i>Pseudomonas</i> sp. (Gamma-P)                    | 99.90%         | JN244973                 | 1                  |
| <i>Sphingobium yanoikuyae</i> (Alpha-P)             | 99.90%         | DQ659593                 | 1                  |
| <i>Thalassospira permensis</i> (Alpha-P)            | 99.90%         | FJ860275                 | 1                  |
| Alphaproteobacterium                                | 99.80%         | AY515421                 | 1                  |
| <i>Marteella mediterranea</i> (Alpha-P)             | 99.80%         | EU440955                 | 1                  |
| Uncultured <i>Nitratireductor</i> sp. (Alpha-P)     | 99.70%         | AM981316                 | 1                  |
